# Supplementary material for: Costunolide induces apoptosis and inhibits migration and invasion in H1299 lung cancer cells
Source: PubMed Central journal article supplement — Oncol Rep. 2020 Mar 26;43(6):1986–94. doi: 10.3892/or.2020.7566 (PMC7160540; doi:10.3892/or.2020.7566), 2020-03-26
Supplement: Supplementary_Data.pdf [file Supplementary_Data.pdf]

Table SI. Primer sequences employed in reverse transcription-quantitative PCR.

| Primer                      | Primer sequence (5'-3')   | Supplier                |
|-----------------------------|---------------------------|-------------------------|
| GAPDH forward               | GGAAGGTGAAGGTCGGAGTCA     | Invitrogen <sup>a</sup> |
| GAPDH reverse               | GTCATTGATGGCAACAATATCCACT | Invitrogen              |
| B-Raf forward               | AGAAAGCACTGATGATGAGAGG    | Invitrogen              |
| B-Raf reverse               | GGAAATATCAGTGTCCCAACCA    | Invitrogen              |
| E-cadherin forward          | CCAGACCCACTCAGATGTCAAG    | Takara Bio, Inc.        |
| E-cadherin reverse          | GGCAGGTATGGAGAGGAAGA      | Takara Bio, Inc.        |
| N-cadherin forward          | AACCTGGCCGAGGACATCA       | Takara Bio, Inc.        |
| N-cadherin reverse          | TCAAGGTCAAGACGTGCCAGA     | Takara Bio, Inc.        |
| Integrin $\alpha$ 2 forward | ACTTTGTTGCTGGTGCTCCT      | Takara Bio, Inc.        |
| Integrin $\alpha$ 2 reverse | CAAGAGCACGTCTGTAATGG      | Takara Bio, Inc.        |
| Integrin $\beta$ 1 forward  | GACGCCGCGCGAAAAGATG       | Takara Bio, Inc.        |
| Integrin $\beta$ 1 reverse  | GCACCACCCACAATTTGGCCC     | Takara Bio, Inc.        |
| MMP2 forward                | CTCATCGCAGATGCCTGGAA      | Takara Bio, Inc.        |
| MMP2 reverse                | TTCAGGTAATAGGCACCCTTGAAGA | Takara Bio, Inc.        |

<sup>a</sup>Invitrogen, Thermo Fisher Scientific, Inc. MMP2, matrix metalloprotease 2.
